# Supplementary material
Source: PubMed Central journal article supplement (PMC8890748)
Supplement: NIHMS1779206-supplement-Supplementary_Tables_1_and_2.pdf [file NIHMS1779206-supplement-Supplementary_Tables_1_and_2.pdf]

## **SUPPLEMENTARY MATERIALS**

### **Pharmacists as accessible health care providers: quantifying the opportunity**

Samantha N Valliant; Sabree C Burbage, PharmD, MPH; Shweta Pathak, MPH, PhD; and Benjamin Y Urick, PharmD, PhD

This supplementary material contains the results of the sensitivity analyses and comparisons of visit frequency between community pharmacies and physicians or other qualified health professionals among patients who had at least one visit to each group. The Pharmacy: Physician/QHP Count Ratio is a unit ratio that represents the ratio of two different units with a denominator of 1 derived by dividing the numerator by the denominator.

### **Supplementary Table 1. Sensitivity Analysis: Comparing 0-day and 13-day Pharmacy Visit Windows**

### **Supplementary Table 2. Double Visit: Description of Population and Visit Counts**

Supplementary Table 1. Sensitivity Analysis: Comparing 0-day and 13-day Pharmacy Visit Windows

| Visit Window                                                       | 0-Day              |                    |                              | 13-Day             |                    |                              |
|--------------------------------------------------------------------|--------------------|--------------------|------------------------------|--------------------|--------------------|------------------------------|
|                                                                    | Full Sample        | MCC <sup>a</sup>   | Super Utilizers <sup>b</sup> | Full Sample        | MCC <sup>a</sup>   | Super Utilizers <sup>b</sup> |
| Pharmacist Visit Count per patient [Median (IQR)]                  | 5 (2-13)           | 17 (9-29)          | 18 (8-21)                    | 4 (1-10)           | 11 (7-15)          | 12 (7-15)                    |
| Physician/ QHP <sup>d</sup> Visit Count per patient [Median (IQR)] | 3 (1-5)            | 7 (4-11)           | 9 (5-14)                     | 3 (1-5)            | 7 (4-11)           | 9 (5-14)                     |
| Pharmacy: Physician/ QHP <sup>d</sup> Count Ratio                  | 1.7:1 <sup>c</sup> | 2.4:1 <sup>c</sup> | 2:1 <sup>c</sup>             | 1.3:1 <sup>c</sup> | 1.6:1 <sup>c</sup> | 1.3:1 <sup>c</sup>           |

<sup>a</sup>Multiple Chronic Conditions

<sup>b</sup>Top 5% of Total Healthcare Cost

<sup>c</sup>Wilcoxon Rank Sum P-value <0.0001

<sup>d</sup>Qualified Healthcare Professional

Abbreviations: SD=Standard deviation, IQR=Interquartile range.

Supplementary Table 2. Double Visit: Description of Population and Visit Counts

| Cohort                                                             | Full Sample        | MCC <sup>b</sup>   | Super Utilizers <sup>c</sup> |
|--------------------------------------------------------------------|--------------------|--------------------|------------------------------|
| N                                                                  | 9,199,942          | 1,550,079          | 597,719                      |
| Age [Mean (SD)]                                                    | 43.1 (13.3)        | 50.9 (10.7)        | 48.6 (11.9)                  |
| Sex [Female N (%)]                                                 | 5,317,901 (55.8)   | 975,287 (56.5)     | 343,946 (57.5)               |
| Number of Chronic Conditions <sup>a</sup> [Median (IQR)]           | 0 (0-1)            | 2 (2-3)            | 2 (1-3)                      |
| Pharmacist Visit Count per patient [Median (IQR)]                  | 6 (3-13)           | 14 (8-20)          | 14 (8-21)                    |
| Physician/ QHP <sup>e</sup> Visit Count per patient [Median (IQR)] | 4 (2-6)            | 7 (4-11)           | 9 (5-15)                     |
| Pharmacy: Physician/ QHP <sup>e</sup> Count Ratio                  | 1.5:1 <sup>d</sup> | 2.0:1 <sup>d</sup> | 1.6:1 <sup>d</sup>           |

<sup>a</sup>Derived using Elixhauser conditions

<sup>b</sup>Multiple Chronic Conditions

<sup>c</sup>Top 5% of Total Healthcare Cost

<sup>d</sup>Wilcoxon Rank Sum P-value <0.0001

<sup>e</sup>Qualified Healthcare Professional

Abbreviations: SD=Standard deviation, IQR=Interquartile range.
